# Supplementary material for: Combining echocardiography with carotid ultrasound parameters in predicting major adverse cardiovascular events among older individuals with coronary artery disease
Source: PeerJ. 2025 Jul 23;13:e19688. doi: 10.7717/peerj.19688 (PMC12296572; doi:10.7717/peerj.19688)
Supplement: Supplemental Information 1 [file peerj-13-19688-s001.xlsx]

## Sheet: non-MACE group
No	Age (years)	Gender [n (%)]（1：M；0：F）	BMI (kg/cm2)	Smoking history [n (%)]	Drinking history [n (%)]	Type of chest pain [n (%)] (AMI/UA)	Aspirin	Statins	Hypertension（1：Y；0：N）	Diabetes（1：Y；0：N）	Hyperlipidemia（1：Y；0：N）	Lesion vessel numbers（1：single;2:double;3:three or more)	LVEDD/mm	LVEF/%	A-value /(cm/s)	IMT/mm	Crouse integral
1	68.2	1	25.86	0	0	0	0	0	0	0	0	0	53.6	56.91	46.96	2.43	0.87
2	71.89	1	24.48	1	0	0	1	0	0	0	0	0	43.3	47.42	53.71	1.49	0.87
3	64.74	1	23.61	1	1	0	1	0	0	0	1	0	60.62	39.67	55.25	1.54	0.73
4	65.34	0	24.55	0	1	0	1	1	0	0	0	0	50.35	41.67	47.14	1.62	0.66
5	76.03	0	25.37	0	0	0	1	0	1	0	0	0	52.84	55.61	48.67	1.57	0.81
6	64.6	0	23.14	1	0	0	1	1	0	0	0	0	51.33	49.97	43.7	1.93	0.78
7	67.19	1	29.62	0	1	1	0	1	0	0	0	0	59.57	51.54	50.34	1.71	0.9
8	75.27	1	24.76	1	1	0	1	1	0	0	0	0	44.31	41.58	46.25	1.61	0.76
9	60.15	1	26.36	0	0	0	1	0	0	0	1	0	60.4	64.25	52.55	1.35	0.79
10	55.3	1	23.89	1	1	0	1	1	1	0	0	0	42.51	35.8	47.56	1.16	0.57
11	64.17	0	22.37	0	0	0	1	1	1	0	0	0	39.47	50.17	58.08	1.58	0.78
12	72.18	1	24.36	0	0	1	0	0	0	0	0	0	57.49	62.63	52.5	1.74	0.89
13	67.38	0	24.98	0	0	0	1	1	0	0	1	0	56.68	51.77	54.69	1.46	0.37
14	68.59	1	25.09	0	1	0	1	0	1	0	0	0	52.99	45.86	71.85	2.06	1.08
15	68.78	1	22.55	1	1	0	0	0	0	1	0	0	67.21	51.49	56.03	2.02	0.76
16	71.89	1	22.55	1	0	0	1	0	0	1	0	0	51.09	59.05	59.64	1.82	0.72
17	63.83	0	20.65	0	0	1	0	0	0	0	0	0	50.27	56.88	46.75	1.39	0.39
18	65.64	1	25.74	0	0	0	1	1	0	0	0	0	49.04	48.27	48.64	1.81	0.87
19	57.62	1	24.87	0	0	0	0	0	0	0	0	0	46.97	63.01	50.69	1.51	0.69
20	58.92	0	25.99	0	0	1	1	1	1	0	0	0	49.36	31.19	61.41	1.82	0.85
21	63.6	1	21.95	1	0	0	1	1	0	0	0	0	50.32	51.57	54.54	1.28	0.63
22	72.65	1	21.52	1	0	1	0	0	0	0	0	0	45.98	48.14	58.87	1.69	0.75
23	66.26	0	22.52	0	0	1	1	1	0	0	0	0	53.09	53.37	56.25	1.03	0.88
24	73.09	1	26.79	0	1	0	0	0	0	0	0	0	54.8	41.8	45.57	1.61	0.86
25	68.6	1	22.22	0	0	1	1	1	0	0	0	0	62.08	51.51	43.74	1.38	0.58
26	74.78	0	24.65	0	1	1	1	1	0	0	1	0	44.32	55.64	44.31	2.11	1.05
27	73.89	0	24.75	0	0	0	1	1	0	0	0	0	51.07	48.77	55.75	1.35	0.67
28	54.2	0	25.27	0	0	0	1	1	1	0	0	1	50.49	56.03	37.14	1.87	0.67
29	76.78	1	26.25	1	0	0	1	0	1	0	0	1	54	46.27	49.18	2.04	0.92
30	59.29	0	25.21	0	0	0	1	1	0	0	0	1	45.97	57.56	62.61	1.63	0.77
31	72.23	1	27.45	1	0	0	1	1	0	0	1	1	52.31	63.94	62.6	1.46	0.77
32	54.95	0	22.79	0	0	0	1	0	0	0	0	1	48.57	53.11	33.39	0.97	0.78
33	69.94	1	22.22	1	0	1	1	1	0	0	0	1	58.92	50.03	43.81	1.87	0.79
34	68.5	1	29.46	0	0	1	1	1	0	0	0	1	48.83	47.55	46.17	1.99	0.74
35	75.38	0	24.67	0	0	1	1	1	0	0	0	1	58.45	54.88	53.1	1.45	0.71
36	65.49	0	22.8	1	0	0	1	1	1	0	0	1	47.49	54.92	56.85	1.56	0.69
37	66.83	1	26.11	0	0	1	1	1	1	0	0	1	53.42	33.35	66.16	1.54	0.71
38	55.95	1	25.16	0	1	0	0	0	0	0	0	1	55.22	40.26	62.55	1.59	0.83
39	66.24	1	23.87	1	0	0	1	0	0	0	0	1	32.6	42.19	60.23	1.58	0.6
40	70.33	1	25.06	0	0	0	1	1	1	1	0	1	47.16	49.47	54.13	2.11	0.64
41	59.19	1	26.62	0	0	1	1	1	0	0	0	1	63.99	44.22	53.9	1.49	0.65
42	70.7	1	24.01	0	1	1	1	1	1	0	0	1	59.95	62.91	51.92	1.03	0.85
43	62.71	1	26.87	0	1	1	1	1	0	0	1	1	46.5	42.9	49.97	0.92	1.13
44	58.59	1	24.57	0	0	0	1	1	1	0	0	1	45.43	60.7	45.13	1.47	0.73
45	73.13	1	24.56	0	0	1	0	1	0	0	0	1	48.85	41.96	46.23	1	0.71
46	56.42	1	22.66	0	0	0	1	0	1	1	0	1	56.65	49.22	58.35	1.82	0.72
47	71.95	1	26.34	0	0	0	0	0	0	0	0	1	56.58	55.07	40.04	1.25	0.78
48	76.75	1	25.26	1	0	1	0	0	1	0	1	1	63.45	50.71	47.13	1.46	0.7
49	67.05	1	23.65	0	0	1	1	0	0	0	0	1	57.19	72.6	50.46	1.9	0.92
50	65.8	0	24.97	1	1	1	1	1	0	1	0	1	54.64	62.04	50.5	1.71	0.44
51	62.77	0	24.11	0	0	1	1	1	0	1	0	1	56.38	64.49	49.55	2.24	0.66
52	50.1	1	28.01	0	1	0	1	0	0	0	0	1	59.95	50.82	61.38	2.18	0.75
53	57.5	1	25.7	0	1	0	1	1	0	1	0	1	53.8	49.45	49.38	1.71	0.58
54	64.97	0	26.36	0	0	1	1	1	0	0	0	1	51.22	48.45	60.07	1.31	0.73
55	63.59	1	22.45	0	0	0	0	1	0	0	0	1	60.2	54.37	51.92	1.4	0.72
56	72.46	1	24.82	0	0	1	1	1	1	0	1	1	63.27	47.95	60.37	1.64	0.65
57	51.09	1	25.34	0	0	0	1	1	1	0	1	1	64.07	67.26	48.62	2.06	0.67
58	66.93	1	22.81	0	1	0	1	1	1	0	0	1	47.42	58.64	51.24	1.85	0.56
59	56.26	1	24.86	0	0	0	0	1	0	0	0	1	47.29	56	57.15	1.46	0.87
60	67.63	0	23.69	0	0	0	1	1	0	1	0	1	45.03	44.36	46	1.56	0.89
61	68.53	0	19.88	1	0	0	0	1	1	0	0	1	52.68	56.24	52.82	1.75	1.03
62	71.55	0	19.69	0	1	0	1	0	1	0	0	1	45.37	53.58	58.1	1.98	0.86
63	70.63	0	21.54	0	0	1	1	1	0	0	0	1	63.83	41.36	56.95	1.89	0.74
64	75.32	0	26.25	1	0	1	1	1	1	0	1	1	47.45	51.83	58.98	1.53	0.72
65	57.8	1	25.43	0	0	0	0	0	0	0	1	1	50.64	51.53	49.72	1.55	0.99
66	72.11	0	23.66	0	0	0	0	0	1	0	0	1	55.77	62.42	65.15	1.68	0.84
67	64.91	0	22.74	0	1	0	1	1	1	0	1	1	50.11	60.91	52.66	1.9	0.67
68	58.96	0	21.69	0	1	0	1	1	0	0	0	2	56.6	44.13	47.02	1.87	0.64
69	68.7	1	23.19	0	0	0	0	0	1	0	0	2	56.71	51.7	48.49	1.59	0.75
70	67.25	0	26.23	0	1	0	1	1	1	0	0	2	55.25	45.57	52.33	2.08	0.61
71	64.4	1	25.42	1	0	0	1	0	1	0	0	2	51.74	48.62	67.72	1.5	0.77
72	67.11	1	24.73	1	0	0	1	1	0	0	0	2	61.57	51.07	57.19	1.35	0.41
73	70.46	1	20.59	0	0	0	1	1	0	0	0	2	51.28	55.67	59.95	1.73	0.58
74	62.47	1	27.38	0	0	0	0	1	0	0	0	2	49.15	52.02	55.79	1.09	0.75
75	60.45	1	22.02	1	0	1	1	1	1	0	0	2	56.17	48.03	55.54	0.91	0.95
76	77.39	1	24.69	1	0	0	1	0	1	0	0	2	48.57	36.67	41.59	1.75	0.52
77	76.2	1	20.34	1	1	1	0	1	1	0	0	2	57.18	51.35	66.08	2.37	0.81
78	57.08	0	22.09	1	1	1	1	1	0	0	0	2	55.05	43.81	47.22	1.5	0.66
79	72.99	1	25.99	0	1	1	1	0	0	0	0	2	52.9	68.95	63.56	2.28	0.98
80	64.31	0	27.68	1	0	1	1	1	0	0	0	2	56.86	54.25	58.5	1.85	0.74
81	78.42	0	21.5	0	1	0	0	1	0	0	0	2	48.34	44.73	59.57	1.61	0.77
82	63.69	1	23.63	0	1	0	0	1	0	0	0	2	52.74	49.82	45.85	1.51	0.67
83	55.07	1	26.22	0	0	0	1	1	1	0	0	2	55.57	59.3	56.61	2.06	0.74
84	79.49	0	26.31	0	0	0	0	0	0	0	0	2	49.37	60.67	42.07	1.75	0.7
85	59.54	0	23.99	0	0	1	1	1	0	0	0	2	55.09	37.69	39.61	1.28	0.5
86	73.15	0	22.42	0	0	0	1	1	0	0	0	2	48.12	52.64	50.58	2	0.65
87	63.14	0	24.58	0	0	0	1	1	0	0	0	2	44.23	49.89	54.54	1.55	0.71
88	76.94	0	23.22	0	0	0	1	1	0	0	0	2	53.68	47.53	58.82	2.36	0.93
89	67.58	1	16.65	0	0	0	1	1	1	0	1	2	43.47	53.13	69.65	2.12	0.88
90	70.91	1	24.7	0	0	1	0	0	0	0	1	2	40.32	68.7	62.84	1.82	0.91

## Sheet: MACE group
No	Age (years)	Gender [n (%)]（1：M；0：F）	BMI (kg/cm2)	Smoking history [n (%)]	Drinking history [n (%)]	Type of chest pain [n (%)] (AMI/UA)	Aspirin	Statins	Hypertension（1：Y；0：N）	Diabetes（1：Y；0：N）	Hyperlipidemia（1：Y；0：N）	Lesion vessel numbers（1：single;2:double;3:three or more)	LVEDD/mm	LVEF/%	A-value /(cm/s)	IMT/mm	Crouse integral
1	58.71	1	26.28	0	0	1	0	1	0	0	1	0	52.09	61.86	44.56	2.16	0.45
2	70.06	1	24.94	0	1	0	1	0	0	1	0	0	51.48	45.49	58.32	1.98	0.63
3	60.88	1	23.3	0	0	1	0	0	1	0	0	0	48.05	44.96	55.08	1.96	0.85
4	65.28	1	25.72	0	1	1	1	1	1	0	1	0	53.74	33.93	38.17	1.81	0.58
5	67.6	1	21.79	0	1	0	1	1	0	0	0	0	55.31	46.66	41.25	1.55	1.21
6	78.57	1	22.09	1	1	0	1	1	0	0	0	0	55.03	46.3	50.17	2.1	1.03
7	91.11	1	17.9	0	0	1	1	1	0	0	1	0	53	51.62	43.78	1.32	0.9
8	65.38	1	18.08	0	0	0	1	1	1	0	0	0	50.12	63.31	46.05	2.46	0.79
9	60.42	1	29.08	0	0	0	0	1	0	0	1	0	57.17	56.04	39.78	1.94	0.94
10	69.18	1	27.38	0	0	1	1	1	0	0	0	0	60.24	46.71	56.89	1.83	1.14
11	67.01	0	25.22	1	0	0	1	1	0	0	0	0	64.24	57.46	35	1.44	0.66
12	77.32	1	22.41	1	0	1	1	1	1	0	0	0	60.57	50.89	40.57	1.58	0.82
13	64.26	1	22.12	0	1	0	0	0	0	0	0	0	39.04	44.37	49.02	1.51	0.88
14	66.41	1	24.67	0	0	0	1	1	0	0	0	0	52.58	39.37	70.02	2.3	0.74
15	71.24	0	27.15	0	0	0	1	1	0	0	0	0	55.87	44.47	46.49	1.71	0.88
16	69.3	1	23.04	0	1	0	0	0	0	0	0	0	65.99	46.83	47.68	1.67	0.88
17	58.11	1	25.1	0	0	0	0	0	1	0	0	0	49.33	46.95	70.9	1.89	0.96
18	71.99	1	24.88	0	0	0	1	1	0	0	0	1	56.33	43.41	55.17	1.69	1.03
19	67.37	1	21.99	0	0	1	1	1	1	0	0	1	50.37	38.13	46.42	1.63	0.88
20	62.7	1	26.65	0	1	1	1	1	0	0	0	1	64.11	28.03	56.78	1.41	0.72
21	70.91	0	25.4	0	0	0	1	0	1	1	0	1	61.61	41.58	58.25	1.57	1.3
22	66.78	1	28.25	0	0	1	1	0	0	1	0	1	53.48	58.82	58.14	1.54	0.64
23	77.58	1	23.98	1	1	1	1	1	0	0	0	1	55.55	46.37	43.41	2.09	0.29
24	57.8	0	24.44	1	0	1	1	0	0	0	0	1	55.69	47.53	50.82	1.79	1.04
25	55.87	1	25.58	0	0	0	1	1	0	0	0	1	51.57	46.06	57.09	1.37	0.79
26	62.21	1	25.19	0	0	0	1	0	0	0	0	1	50.87	37.26	35.99	2.38	1.02
27	74.5	0	22.72	0	0	0	0	1	0	0	1	1	57.84	30.63	57.64	1.64	0.56
28	66.61	1	25.26	1	0	0	1	1	1	0	0	1	71.19	53.2	50.65	2.41	1.4
29	64.6	1	23.13	0	0	0	0	1	0	0	0	1	52.25	55.68	49.65	1.93	0.77
30	76.18	0	26.1	1	0	1	1	0	0	0	0	1	52.31	61.28	44.56	1.98	0.46
31	59.35	1	26.63	0	0	0	1	1	0	0	1	1	60.62	44.4	46.3	1.59	0.85
32	63.89	1	23.4	1	0	0	1	1	0	0	0	1	53.87	61.17	55.36	1.57	0.59
33	65.85	0	22.07	1	1	0	1	1	0	0	0	1	56.47	61.33	54.06	1.99	0.91
34	70.72	1	27.51	0	1	1	0	1	1	0	0	1	67.34	52.03	55	1.6	0.86
35	55.51	1	24.56	1	0	0	1	1	0	0	0	1	56.76	53.84	58.8	1.92	0.88
36	70.22	1	25.18	1	0	1	1	0	0	0	1	1	50.94	51.39	47.08	1.82	0.76
37	62.75	1	22.17	1	0	0	1	1	0	0	0	1	60.32	63.98	56.24	1.72	0.99
38	70.85	1	27.32	1	0	1	1	1	0	0	0	1	60.52	46.48	46.83	1.35	1.01
39	55.33	0	25.65	1	1	0	1	1	0	1	0	2	46.62	53.81	53.39	1.41	0.79
40	62.14	1	25.97	0	1	1	0	1	0	0	0	2	46.63	45.11	51.44	1.37	0.47
41	65.4	1	21.95	0	0	1	1	0	1	0	0	2	60.35	54.57	54.83	1.96	0.63
42	77.05	1	25.97	1	1	0	1	0	1	0	0	2	57.02	46.91	37.01	2.23	0.45
43	68.01	1	26.59	0	1	0	1	1	0	1	0	2	55.39	51.71	42.7	1.84	1.04
44	75.31	0	23.59	1	1	1	1	0	0	0	0	2	51.8	56.59	52.36	1.98	0.73
45	68.95	1	21.02	1	1	0	1	1	0	0	0	2	59.91	42.91	43.95	1.61	0.88
46	70.79	0	25.87	0	0	1	0	1	0	1	0	2	51.4	49.17	42.79	2.2	0.92
47	76.59	0	25.51	0	0	1	1	1	0	0	0	2	45.07	47.09	45.16	1.78	0.93
48	68.89	0	22.76	0	0	1	1	1	1	0	0	2	50.28	49.36	43.2	1.95	1.13
49	57.14	0	20.87	0	0	0	1	1	1	0	0	2	68.72	35.9	29.68	1.61	0.99
50	57.93	1	24.04	0	0	0	1	0	1	0	0	2	45.59	39.76	54.81	1.96	0.91
51	71.07	1	23.51	0	0	1	0	0	0	0	0	2	50.63	37.59	53.54	1.04	1.25

## Sheet: Deff
	non-MACE group	MACE group	Statistic	P_value	Significance	Data Type	Statistical Method	Mean_A	SD_A	Median_A	Q1_A	Q3_A	Min_A	Max_A	Mean_B	SD_B	Median_B	Q1_B	Q3_B	Min_B	Max_B	KS_test_P_A	SW_test_P_A	KS_test_P_B	SW_test_P_B	Kurtosis_A	Skewness_A	Kurtosis_B	Skewness_B	Variance_test_P	Cohen_d	Hedges_g	Power	type_I_error	type_II_error	Indexes
Age (years)	66.54 ± 6.78	67.25 ± 7.14	0.583	0.561	ns	numerical	Two Sample t-test	66.54	6.78	67.08	62.73	71.94	50.1	79.49	67.25	7.14	67.01	62.45	70.88	55.33	91.11	0.873	0.156	0.747	0.098	-0.667	-0.281	0.763	0.568	0.664	-0.102	-0.102	0.089	0.05	0.911	Age (years)
Gender [n (%)](1:M;0:F)	55 (61.11%) / 35 (38.89%)	38 (74.51%) / 13 (25.49%)	2.603	0.107	ns	binary	Pearson's Chi-squared test	0.61	0.49	1	0	1	0	1	0.75	0.44	1	0.5	1	0	1	NA	NA	NA	NA	NA	NA	NA	NA	NA	NA	NA	NA	0.05	NA	Gender [n (%)](1:M;0:F)
BMI (kg/cm2)	24.26 ± 2.15	24.35 ± 2.34	0.232	0.817	ns	numerical	Two Sample t-test	24.26	2.15	24.61	22.75	25.63	16.65	29.62	24.35	2.34	24.88	22.74	25.92	17.9	29.08	0.358	0.153	0.698	0.165	0.921	-0.403	0.283	-0.557	0.495	-0.041	-0.04	0.056	0.05	0.944	BMI (kg/cm2)
Hypertension(1:Y;0:N)	30 (33.33%) / 60 (66.67%)	14 (27.45%) / 37 (72.55%)	0.525	0.469	ns	binary	Pearson's Chi-squared test	0.33	0.47	0	0	1	0	1	0.27	0.45	0	0	1	0	1	NA	NA	NA	NA	NA	NA	NA	NA	NA	NA	NA	NA	0.05	NA	Hypertension(1:Y;0:N)
Diabetes(1:Y;0:N)	8 (8.89%) / 82 (91.11%)	6 (11.76%) / 45 (88.24%)	0.301	0.583	ns	binary	Pearson's Chi-squared test	0.09	0.29	0	0	0	0	1	0.12	0.33	0	0	0	0	1	NA	NA	NA	NA	NA	NA	NA	NA	NA	NA	NA	NA	0.05	NA	Diabetes(1:Y;0:N)
Hyperlipidemia(1:Y;0:N)	14 (15.56%) / 76 (84.44%)	7 (13.73%) / 44 (86.27%)	0.086	0.769	ns	binary	Pearson's Chi-squared test	0.16	0.36	0	0	0	0	1	0.14	0.35	0	0	0	0	1	NA	NA	NA	NA	NA	NA	NA	NA	NA	NA	NA	NA	0.05	NA	Hyperlipidemia(1:Y;0:N)
Lesion vessel numbers(1:single;2:double;3:three or more)	0 : 27 (30%)/1 : 40 (44.44%)/2 : 23 (25.56%)	0 : 17 (33.33%)/1 : 21 (41.18%)/2 : 13 (25.49%)	0.196	0.907	ns	categorical	Pearson's Chi-squared test	0.96	0.75	1	0	1.75	0	2	0.92	0.77	1	0	1.5	0	2	NA	NA	NA	NA	NA	NA	NA	NA	NA	NA	NA	NA	0.05	NA	Lesion vessel numbers(1:single;2:double;3:three or more)
LVEDD/mm	52.47 ± 6.28	55.16 ± 6.37	2.434	0.016	*	numerical	Two Sample t-test	52.47	6.28	52.71	48.4	56.64	32.6	67.21	55.16	6.37	55.03	51.17	60.08	39.04	71.19	0.999	0.85	0.853	0.566	0.096	-0.135	0.096	0.276	0.891	-0.427	-0.424	0.677	0.05	0.323	LVEDD/mm
LVEF/%	51.59 ± 8.15	48.24 ± 8.36	2.322	0.022	*	numerical	Two Sample t-test	51.59	8.15	51.5	47.45	56.02	31.19	72.6	48.24	8.36	46.91	44.38	53.83	28.03	63.98	0.777	0.894	0.605	0.51	-0.055	0.077	-0.384	-0.116	0.821	0.407	0.405	0.635	0.05	0.365	LVEF/%
A-value /(cm/s)	53.16 ± 7.45	49.47 ± 8.24	2.719	0.007	**	numerical	Two Sample t-test	53.16	7.45	52.74	47.3	58.46	33.39	71.85	49.47	8.24	49.65	43.87	55.12	29.68	70.9	0.968	0.994	0.81	0.362	-0.232	0.043	0.146	0.144	0.408	0.477	0.474	0.771	0.05	0.229	A-value /(cm/s)
IMT/mm	1.66 ± 0.34	1.79 ± 0.31	2.219	0.028	*	numerical	Two Sample t-test	1.66	0.34	1.62	1.46	1.87	0.91	2.43	1.79	0.31	1.79	1.58	1.97	1.04	2.46	0.825	0.486	0.908	0.701	-0.245	-0.029	-0.41	0.138	0.513	-0.389	-0.387	0.596	0.05	0.404	IMT/mm
Crouse integral	0.75 ± 0.14	0.85 ± 0.23	2.774	0.007	**	numerical	Welch Two Sample t-test	0.75	0.14	0.74	0.67	0.85	0.37	1.13	0.85	0.23	0.88	0.72	0.99	0.29	1.4	0.602	0.334	0.77	0.779	0.43	-0.062	-0.078	-0.072	< 0.001	-0.549	-0.546	0.875	0.05	0.125	Crouse integral

## Sheet: cor
	rho	p.value
LVEDD/mm	0.191	0.023
LVEF/%	-0.187	0.027
A-value /(cm/s)	-0.225	0.007
IMT/mm	0.178	0.035
Crouse integral	0.266	0.001

## Sheet: ROC
	Best_threshold	Sensitivities	Specificities	AUC	Youden_index	F1_score
LVEDD/mm	50.115	0.863	0.356	0.615	0.219	0.575
LVEF/%	47.255	0.549	0.756	0.612	0.305	0.324
A-value /(cm/s)	46.895	0.431	0.8	0.635	0.231	0.382
IMT/mm	1.565	0.784	0.411	0.607	0.195	0.556
Crouse integral	0.875	0.529	0.822	0.66	0.351	0.574

## Sheet: logreg
	Coefficient	Std_Error	Wald	P_Value	OR	CI_Lower	CI_Upper	AIC	BIC	Formula
LVEDD/mm	0.069	0.029	2.351	0.019	1.071	1.013	1.137	182.65	188.548	logit(P) = -4.26 + 0.069 * LVEDD/mm
LVEF/%	-0.050	0.022	2.251	0.024	0.951	0.909	0.992	183.172	189.07	logit(P)=1.937-0.05*LVEF/%
A-value /(cm/s)	-0.063	0.024	2.601	0.009	0.939	0.894	0.983	181.225	187.123	logit(P)=2.641-0.063*A-value/(cm/s)
IMT/mm	1.207	0.559	2.161	0.031	3.344	1.147	10.381	183.63	189.528	logit(P)=-2.649+1.207*IMT/mm
Crouse integral	3.088	1.057	2.921	0.003	21.923	2.999	194.937	178.979	184.877	logit(P)=-3.028+3.088*Crouseintegral

## Sheet: muti_logreg
	Coefficient	Std_Error	Wald_Stat	P_Value	OR	OR_CI_Lower	OR_CI_Upper
LVEDD/mm	0.064	0.033	1.913	0.056	1.066	0.998	1.138
LVEF/%	-0.064	0.025	-2.549	0.011	0.938	0.893	0.985
A-value /(cm/s)	-0.075	0.027	-2.818	0.005	0.927	0.880	0.977
IMT/mm	1.679	0.645	2.603	0.009	5.358	1.514	18.963
Crouse integral	3.249	1.160	2.801	0.005	25.770	2.652	250.376
