# Supplementary material for: Combining echocardiography with carotid ultrasound parameters in predicting major adverse cardiovascular events among older individuals with coronary artery disease
Source: PeerJ. 2025 Jul 23;13:e19688. doi: 10.7717/peerj.19688 (PMC12296572; doi:10.7717/peerj.19688)
Supplement: Supplemental Information 2 [file peerj-13-19688-s002.xlsx]

## Sheet: non-MACE group
No	Age (years)	Gender [n (%)]（1：M；0：F）	BMI (kg/cm2)	Smoking history [n (%)]	Drinking history [n (%)]	Type of chest pain [n (%)] (AMI/UA)	Aspirin	Statins	Hypertension（1：Y；0：N）	Diabetes（1：Y；0：N）	Hyperlipidemia（1：Y；0：N）	Lesion vessel numbers（1：single;2:double;3:three or more)	LVPWT/mm	IVST/mm	LVESD/mm	LVEDD/mm	LAD/mm	LVEF/%	E-value /(cm/s)	A-value /(cm/s)	E/A	IMT/mm	Vs/(cm/s)	Vd/(cm/s)	RI	Crouse integral
1	63.38	0	28.07	1	0	0	0	0	0	0	0	0	9.97	12.41	14.87	53.1	45.69	54.08	90.87	60.27	1.33	1.55	35.18	9.97	0.62	0.76
2	65.93	0	26.69	1	0	0	1	1	0	0	0	0	10.62	5.26	21.85	56.33	41.21	33.19	78.06	52.54	1.1	1.66	28.58	16.99	0.67	0.82
3	67.89	0	26.03	0	0	1	1	0	1	0	1	0	8.71	14.23	23.47	54.56	33.79	66.84	78.01	59.4	0.97	1.63	34.38	15.02	0.58	0.69
4	65.99	0	23.96	1	0	0	1	1	1	1	0	0	6.44	10.79	22.21	52.92	39.47	58.03	77.18	67.9	0.93	1.44	43.61	14.61	0.69	0.83
5	62.85	0	26.52	0	0	0	1	1	0	0	0	0	9.51	6.31	31.31	55.76	40.3	58.06	96.37	58.26	1.21	1.41	55.7	17.49	0.65	0.71
6	58.68	1	25.38	0	0	0	1	0	0	0	0	0	10.98	7.86	19.9	40.62	39.5	49.44	87.72	63.41	1.26	1.51	47.12	14.77	0.64	0.73
7	31.1	0	24.12	0	0	1	1	1	0	0	0	0	11.62	6.8	28.69	59.44	44.75	62.63	95.26	58.98	1.62	1.68	34.72	12.38	0.84	0.6
8	63.65	1	25.68	0	0	0	1	0	0	0	0	0	17.29	11.05	16.71	50.44	43.07	60.32	83.82	63.56	1.12	1.48	48.02	10.73	0.75	0.69
9	67.65	1	27.06	1	0	1	1	1	1	0	0	0	9.23	8.96	23.65	50.2	41.1	40.82	78	37.84	1.67	1.73	26.97	19.93	0.56	0.79
10	51.34	0	25.04	1	0	1	0	1	0	0	0	0	13.52	16.08	21.58	51.72	35.45	51.09	77.57	31.56	1.1	1.44	32.92	19.44	0.72	0.78
11	60.29	0	24.91	1	0	0	0	0	1	0	0	0	11.92	11.54	19.08	52.21	44.98	66.82	76.75	47.45	0.92	1.81	24.14	18.58	0.7	0.7
12	48.89	0	24.79	0	0	1	1	0	0	1	1	0	12	7.15	21.5	56.28	39.16	53.55	91.07	64.99	1.16	1.57	40.48	17.93	0.6	0.81
13	83.69	1	25.03	0	1	0	1	0	0	0	0	0	9.15	7.36	29.83	48.51	41.21	53.47	74.1	68.35	1.04	1.85	40.52	21.83	0.54	0.81
14	78.38	1	25.45	0	0	0	1	0	0	0	0	0	7.16	10.61	21.75	48.08	28.53	38.85	89.36	54.97	0.72	2.03	36.18	15.06	0.52	0.73
15	61.74	1	26.1	0	0	0	0	1	1	0	0	0	13.5	9.13	21.46	50.94	38.28	49.78	72.63	61.41	1.31	1.74	32.29	18.06	0.57	0.7
16	83.72	0	24.66	1	0	0	1	1	0	0	1	0	15.76	8.4	16.56	43.22	38.95	37.78	63.13	60.54	1.98	1.86	24.93	17.96	0.79	0.82
17	64.08	0	27.31	1	0	0	1	0	1	0	0	0	9.19	9.83	23.61	53.48	39.41	54.57	81.82	54.64	0.87	1.96	27.93	13.06	0.74	0.73
18	79.29	1	26.02	0	0	1	1	1	0	0	0	0	7.64	9.74	26.62	56.34	39.94	60.36	101.59	50.59	0.72	1.7	43.02	14.89	0.7	0.58
19	73.14	0	27.55	1	0	1	1	1	0	0	0	0	14.26	11.23	24.77	59.05	38.09	52.86	53.92	60.76	1.32	1.89	35.23	15.6	0.57	0.58
20	61.04	1	26.23	1	0	0	1	1	1	0	0	0	4.76	7.61	27.71	55.35	29.9	46.15	93.79	59.17	0.83	1.26	37.45	13.15	0.57	0.75
21	51.95	1	27.21	0	0	1	1	1	0	0	0	0	15.98	9.12	27.79	65.16	44.26	78.16	82.05	50.74	1.42	1.73	50.93	22.34	0.6	0.79
22	72.92	1	26.56	0	1	0	0	0	0	0	1	0	9.87	12.37	21.66	43.09	38.24	36.07	72.25	46.59	0.99	1.62	34.5	22.44	0.67	0.76
23	66.46	1	26.48	0	1	0	0	1	0	0	0	0	6.46	15.11	23.52	61.44	41.95	61.57	76.9	56.96	0.93	1.28	47.99	17.18	0.66	0.78
24	53.63	0	26.57	1	0	0	0	1	0	0	1	0	11.07	5.48	21.92	48.04	45.73	62.17	84.57	48.71	1.35	1.8	50.1	20.69	0.78	0.82
25	49.66	1	24.42	1	0	0	1	1	1	0	0	0	8.41	12	26.73	54.65	29.72	57.72	68.79	65.58	1.18	1.86	39.45	18.74	0.67	0.74
26	79.65	0	27.36	1	0	1	1	0	0	0	0	0	9.34	12.52	23.04	52.72	39.51	82.3	62.92	51.57	0.19	2.13	48.69	19.26	0.68	0.78
27	77.73	1	26.01	0	1	1	1	1	0	0	0	1	9.21	9.54	26.54	58.44	41.72	54.17	94.01	61.16	1.51	1.85	51.79	19	0.86	0.63
28	75.67	1	22.59	0	1	0	1	1	1	0	1	1	12.05	9.68	31.91	41.61	37.6	44.67	65.37	51.45	1.55	1.76	30.19	13.63	0.72	0.83
29	58.59	1	25.75	0	0	1	1	1	1	0	0	1	15.5	14.08	18.15	48.72	42.96	52.65	76.74	43.54	1.71	1.98	37.94	15.5	0.76	0.7
30	73.39	0	24.21	0	0	0	1	0	0	0	0	1	11.32	13.29	19.26	42.4	36.13	54.64	70.35	66.62	1.09	1.43	41.54	15.72	0.74	0.66
31	84.83	0	26.06	0	0	1	0	1	0	0	0	1	3.88	9.62	12.2	41.84	36.65	61.71	74.09	49.77	1.5	1.36	36.69	14.24	0.84	0.72
32	54.22	0	28.16	0	1	1	1	0	0	0	0	1	7.57	11.1	8.86	39.67	43.36	56.77	87.19	68.42	1.51	1.93	33.72	13.77	0.88	0.73
33	75.36	1	27.21	1	0	0	1	0	0	0	0	1	4.14	1.8	25.14	55.62	29.78	66.65	91.2	54.03	1.32	1.58	38.81	15.34	0.56	0.6
34	66.36	0	25.75	1	1	0	0	1	0	0	0	1	4.87	6.38	20.59	59.44	41.26	43.02	82.51	70.26	1.44	2.21	36.57	16.95	0.58	0.68
35	70.02	1	27.29	1	0	1	1	0	1	0	1	1	8.53	15.28	26.66	51.48	34.63	56.13	81.63	47.94	1.97	1.79	55.13	17.76	0.73	0.81
36	68.12	1	24.27	0	1	0	1	1	0	0	0	1	9.75	7.57	18.61	48.3	42.21	69.57	62.66	55.88	0.86	1.68	35.67	16.04	0.62	0.71
37	78.68	1	24.45	0	1	0	1	1	0	0	1	1	9.02	11.07	25.78	47.45	43.85	62.25	82.51	60.12	1.5	1.31	24.96	20.93	0.69	0.8
38	55.31	0	27.11	1	1	0	1	0	0	0	0	1	8.19	8.1	24.22	36.8	54.35	56.5	83.89	48.15	1.44	1.57	38.96	17.61	0.53	0.77
39	43.52	1	23.94	0	0	0	1	1	0	0	1	1	8.97	8.22	27.78	45.72	36.41	56.68	98.16	76.98	0.94	1.66	39.76	14.82	0.5	0.79
40	80.79	1	26.19	0	1	1	1	1	0	0	0	1	17.78	11.29	22.27	54.87	32.58	37.54	81.48	55.34	1.36	1.93	30.04	14.76	0.79	0.66
41	75.37	0	24.36	0	0	0	1	0	1	0	0	1	4.69	14.56	22.02	59.81	51.03	52.51	75.02	48.51	1.7	1.59	43.35	20.09	0.64	0.77
42	73.77	1	24.99	0	0	0	0	1	0	0	0	1	8.9	13.89	23.94	55.27	38	69.04	90.47	46.17	1.02	1.66	45.8	4.37	0.74	0.82
43	60	1	27.37	0	1	0	1	1	1	1	0	1	15.07	8.63	20.59	51.33	43.66	46.46	63.7	58.98	1.64	1.77	28.16	17.5	0.47	0.77
44	68.75	1	23.74	0	0	1	0	1	0	0	0	1	7.25	7.44	19.25	51.86	40.78	29.41	69.16	53.89	1.44	1.52	49.4	15.9	0.45	0.69
45	77.03	1	25.03	0	0	0	1	0	0	0	0	1	12.96	14.03	25.04	61.76	37.9	56.57	82.31	46.52	1.73	1.87	25.27	17.34	0.54	0.74
46	79.81	1	24.92	0	1	1	1	1	1	1	0	1	9.44	15.72	20.5	60.06	37.71	40.31	61.15	44	1.36	1.72	42.94	15.3	0.65	0.77
47	57.37	1	23.32	1	1	0	0	1	0	1	0	1	9.11	11.29	15.86	52.91	39.25	52.56	83.82	51.04	0.89	1.48	39.12	18.28	0.63	0.67
48	75.59	1	24.96	0	0	1	1	0	1	0	0	1	14.13	11.41	19.18	59.92	34.8	63.87	75.53	60.35	1.23	1.79	38.6	10.71	0.74	0.65
49	76.79	0	24.89	0	0	0	1	1	1	0	0	1	14.83	4.6	27.53	56.24	43.59	48.85	70.54	52.5	0.6	1.5	46.79	19.44	0.66	0.74
50	71.51	0	24.03	0	1	0	1	1	0	0	0	1	8.86	8.79	29.13	52.19	40.5	32.73	64.91	47.58	2.03	2.04	51.88	14.23	0.63	0.8
51	91.98	0	24.64	0	0	1	1	1	0	0	0	1	13.3	16.91	26.16	52.93	34.83	40.5	69.56	69.94	1.39	1.69	51.09	14.17	0.68	0.7
52	77.91	1	26.01	0	0	1	1	0	1	0	0	1	4.4	6.9	23.31	50.62	42.33	56.26	73.83	55.18	1.51	1.55	43.53	15.79	0.52	0.83
53	72.53	1	24.81	0	0	0	0	1	1	0	0	1	13.33	10.96	28.58	61.73	36.98	44.16	72.49	67.09	1.2	1.21	41.13	15.37	0.7	0.79
54	63.27	1	23.04	1	0	0	1	1	0	1	0	1	11.56	8.4	24.1	57.31	43.81	57.64	78.08	40.59	1.13	1.57	43.1	16.67	0.58	0.71
55	57.52	1	25.77	0	0	0	1	0	0	0	0	1	7.92	7.56	21.35	64.37	46.28	76.93	71.29	45.88	1.13	1.77	37.49	15.9	0.58	0.68
56	76.58	1	23.53	0	0	0	1	1	0	0	0	1	6.58	17.23	16.21	56.81	29.33	60.18	96.15	55.7	1.58	1.44	35.69	15.59	0.64	0.77
57	75.12	1	28.79	1	0	0	1	1	0	0	1	1	10.79	10.59	20.23	40.51	46.11	53.96	83.88	62.02	1.47	1.83	39.54	16.16	0.62	0.79
58	68.42	1	26.31	0	0	0	1	1	0	1	0	1	9.96	12.21	17.8	49.73	39.55	53.84	70.69	57.15	0.97	1.7	47.51	15.59	0.58	0.89
59	63.11	1	24.08	0	0	1	1	1	0	0	0	1	12.53	10.46	15.38	62.3	33.77	40.09	80.26	61.12	1.6	1.76	33.21	13.23	0.74	0.9
60	64.41	1	26.89	0	0	0	0	0	0	0	0	1	11.42	8.23	18.67	50.46	47.9	65.02	65.73	59.11	1.2	2.07	35.49	12.34	0.7	0.67
61	82.24	1	22.42	0	0	0	0	0	0	0	1	1	12.21	0.85	21.4	61.51	46.3	52.55	85.28	51.56	1.28	1.58	47.09	20.57	0.62	0.84
62	64.31	1	23.66	0	0	1	1	1	0	0	0	1	2.36	9.82	22.11	56.96	46.86	52.07	70.72	42.65	1.51	1.68	48.51	17.7	0.91	0.87
63	74.62	0	22.79	0	0	0	1	1	1	0	1	1	10.05	12.45	19.37	50.27	33.09	39.16	78.67	50.75	1.25	1.49	36.54	17.77	0.69	0.72
64	78.9	1	25.91	0	1	0	0	1	1	0	0	1	6.66	11.82	26.64	57.72	47.91	41.94	96.55	51.54	1.58	1.85	52.81	8.8	0.54	0.82
65	67.19	1	27.32	0	1	1	1	1	0	0	0	1	19.43	11.48	14.07	54.51	41.81	53.78	70.18	75.25	1.24	1.86	47.14	14.47	0.43	0.71
66	85.86	0	24.81	0	0	1	1	1	1	0	0	2	16.05	13.35	26.25	63.5	41.75	49.76	78.35	52.57	1.64	1.65	23.51	18.11	0.51	0.65
67	66.04	1	25.46	0	1	1	1	1	0	1	0	2	11.66	11	22.45	57.56	38.22	56.79	67.56	60.18	1.21	1.32	45.31	13.36	0.94	0.72
68	67.57	0	25.34	1	0	1	1	1	1	0	0	2	11.98	15.66	22.74	61.07	30.28	56	80.13	56.02	1.02	1.45	40.69	15.94	0.57	0.74
69	61.72	0	25.12	1	0	0	0	1	0	0	0	2	8.83	7.02	23.04	44.95	41	54.16	91.42	51.09	1.53	1.4	35.97	15.09	0.68	0.74
70	56.46	1	25.81	1	0	1	1	1	1	0	0	2	10.4	9.48	20.41	49.7	36.61	51.01	86.14	53.37	1.66	1.55	32.91	20.53	0.66	0.75
71	55.06	0	24.28	0	0	0	1	1	0	0	0	2	7.56	8.04	24.78	65.89	42.73	55.23	65.6	57.34	1.23	1.64	53.07	17.71	0.56	0.7
72	54.13	1	24.94	0	0	0	0	1	0	0	0	2	5.5	8.88	23.02	51.86	37.32	56.94	77.71	38.46	0.81	1.51	32.95	22.5	0.86	0.77
73	51.61	0	28.89	0	0	1	1	1	1	0	0	2	14.94	5.83	23.69	60.75	34.55	47.2	80.26	52.15	1.25	1.29	37.35	11.58	0.47	0.59
74	53.13	0	25.66	0	0	0	1	1	1	0	0	2	14.34	10.55	15.77	48.49	37.07	71.4	74.01	51.71	1.86	1.74	44.46	16.14	0.62	0.84
75	64.02	0	25.39	0	1	0	1	1	0	0	1	2	11.35	4.83	24.66	65.7	44.53	43.83	67.64	53.48	1.05	1.6	36.52	18.44	0.74	0.8
76	60.94	0	24.88	0	0	1	1	0	0	0	0	2	12.83	16.07	27.73	57.86	40.77	48.11	76.2	56.94	1.31	1.76	28.56	20.36	0.45	0.65
77	70.22	1	24.98	0	0	1	1	1	0	0	0	2	5.1	5.41	28.42	52.95	43.17	40.01	90.24	58.18	1.44	1.86	39.91	23.61	0.74	0.87
78	64.08	1	24.29	0	0	1	1	0	0	0	1	2	3.14	13.01	14.46	58.58	32.66	54.53	78.93	52.34	1.47	2	37.77	18.72	0.46	0.76
79	79.34	1	22.76	0	0	0	1	0	0	0	0	2	18.38	11.26	25.94	52.61	43.84	67.26	59.14	61.47	1.16	1.53	40.48	14.23	0.57	0.88
80	68.24	1	28.19	1	0	1	1	1	1	0	0	2	11.55	7.43	24.32	56.17	43.71	51.8	86.05	53.3	0.99	1.32	32.14	16.71	0.69	0.77
81	67.53	1	27.06	0	0	1	1	1	0	0	0	2	15.24	10.26	18.78	65.12	36.43	39.19	74.88	73.47	1.39	1.68	37.24	8.41	0.72	0.83
82	66.43	0	25.01	0	1	0	1	1	0	0	0	2	2.66	13.86	29.1	53.38	49.24	40.88	66.97	54.14	0.97	1.88	32.91	9.39	0.83	0.68
83	58.78	1	24.26	0	0	0	1	1	0	0	0	2	13.06	10.56	26.96	55.61	49.64	69.74	81.43	58.95	1.87	1.81	36.26	18.99	0.56	0.63
84	63.82	1	22.96	0	1	0	0	1	1	0	0	2	3.01	16.05	22.16	52.51	49.58	38.08	59.76	41.24	0.74	1.76	44.69	20.72	0.57	0.74

## Sheet: MACE group
No	Age (years)	Gender [n (%)]（1：M；0：F）	BMI (kg/cm2)	Smoking history [n (%)]	Drinking history [n (%)]	Type of chest pain [n (%)] (AMI/UA)	Aspirin	Statins	Hypertension（1：Y；0：N）	Diabetes（1：Y；0：N）	Hyperlipidemia（1：Y；0：N）	Lesion vessel numbers（1：single;2:double;3:three or more)	LVPWT/mm	IVST/mm	LVESD/mm	LVEDD/mm	LAD/mm	LVEF/%	E-value /(cm/s)	A-value /(cm/s)	E/A	IMT/mm	Vs/(cm/s)	Vd/(cm/s)	RI	Crouse integral
1	83.38	0	26.53	0	0	0	1	0	1	0	0	0	11.64	10.56	26.24	58.15	42.8	41.03	88.43	53.53	0.95	2.04	37.41	16.67	0.6	0.82
2	48.46	1	24.81	0	0	0	1	1	0	0	0	0	7.68	8.13	22.1	66.85	41.36	48.25	101.03	55	1.04	1.77	44.1	16.72	0.7	0.78
3	65.9	1	24.15	1	1	1	0	1	1	1	0	0	11.04	13.49	18.5	52.61	46.41	56.53	77.24	35.91	1.47	1.76	37.72	9.75	0.64	0.82
4	63.61	0	26.27	0	0	0	1	1	0	0	1	0	11.86	7.31	17.41	62.29	38.86	67.68	92.11	56.03	1.4	1.78	38.63	10.77	0.78	0.76
5	62.55	0	25.15	1	0	1	1	0	1	0	0	0	12.74	15.28	21.56	55.69	40.21	57.34	89.31	63.86	1.5	1.72	50.3	23.27	0.65	0.59
6	79.87	0	25.81	1	1	0	1	1	0	0	0	0	2.98	12.9	14.07	52.93	41.9	59.64	80.68	47.27	1.15	1.63	41.54	12.16	0.64	0.77
7	48.1	1	26.36	0	0	0	1	1	0	0	1	0	15.63	13.3	20.17	59.25	32.53	56.38	85.35	42.56	1.06	1.76	44.91	22.96	0.54	0.78
8	47.22	1	23.88	0	0	0	1	1	1	0	0	0	22.92	11.76	27.87	57.63	31.31	42.18	76.27	56.56	1.12	1.59	58.03	10.86	0.65	0.72
9	51.67	1	24.09	0	1	0	1	1	0	0	0	0	6.05	18.07	24.52	56.54	42.15	52.84	69.27	47.59	1.4	1.74	42.23	19.49	0.68	0.7
10	68.59	1	24.79	1	1	0	1	1	1	0	0	0	13.24	11.03	22.21	63.15	41.64	50.78	83.92	57.04	1.59	1.59	36.47	22.85	0.72	0.67
11	71.73	0	27.64	0	0	1	1	0	0	0	0	0	12.43	15.14	23.11	56.55	47.06	54.51	66.58	49.6	1.46	1.41	32.91	12.89	0.72	0.83
12	72.25	1	27.9	0	0	0	1	1	1	1	0	0	9.71	7.05	14.55	67.07	48.26	45.97	58.9	52.1	1.74	2.1	61.43	26.13	0.55	0.84
13	47.48	1	27.63	0	0	0	0	1	1	0	1	0	11.53	16.43	12.35	66.25	43.69	64.28	68.86	66.55	1.1	1.93	25.53	12.97	0.6	0.8
14	61.31	1	25.61	1	0	1	1	0	0	0	0	0	11.36	11.73	26.35	70.32	45.56	43.68	76.37	44.67	1.54	1.73	58.96	24.37	0.74	0.69
15	72.11	0	25.77	0	0	0	1	1	0	0	0	0	11.43	7.2	15.24	64.01	44.89	42.95	72.79	47.82	1.13	1.83	38.1	21.19	0.68	0.89
16	60.96	0	26.65	0	0	0	0	1	1	0	1	0	15.12	16.82	19.58	35.95	38.37	53.06	70.44	56.32	1.08	1.42	32.58	10.13	0.78	0.83
17	50.97	0	25.48	1	1	1	1	0	0	0	0	0	14.75	5.87	29.47	53.4	30.69	30.91	84.82	63.49	0.97	1.51	54.01	8.05	0.73	0.65
18	46.39	1	26.6	0	0	0	1	1	1	0	0	1	13.14	10.15	30.59	50.86	35.03	40.37	85.32	44.55	1.5	1.64	44.39	23.94	0.72	0.86
19	72.67	0	27.2	0	0	1	0	1	1	1	0	1	10.03	15.05	23.47	62.77	37.98	67.3	73.15	45.12	0.88	1.76	26.16	25.92	0.63	0.88
20	75.78	1	24.43	1	0	0	1	1	1	0	0	1	11.08	17.95	18.82	63.14	44.29	42.61	70.41	47.85	1.09	2.03	44.52	12.44	0.81	0.68
21	71.11	1	24.17	0	0	1	0	1	0	0	0	1	13.19	9.56	27.79	59.56	48.79	41.41	84.97	42.01	1.77	1.7	29.75	23.33	0.79	0.76
22	57.99	0	24.82	0	1	1	1	1	0	0	0	1	6.14	13.52	26.82	70.87	37	50.9	72.48	42.18	1.19	1.59	46.63	23.38	0.76	0.71
23	76.07	0	26.6	0	0	1	1	1	0	0	0	1	12.67	8.57	25.35	66.18	48.35	50.52	65.17	47.39	1.67	1.79	38.07	14.89	0.71	0.88
24	75.17	0	28.83	1	1	0	0	1	0	0	0	1	15.24	5.44	15.1	52.82	51.08	45.23	72.96	44.91	1.21	1.65	41.06	16.43	0.78	0.9
25	67.7	1	24.16	0	0	1	0	0	1	0	0	1	14.58	7.03	24.4	56.76	49.58	55.8	68.92	43.25	1.01	1.73	59.7	15.83	0.64	0.79
26	69.55	0	25.35	0	0	1	1	1	0	1	0	1	15.38	16.02	24.2	49.41	45.95	50.91	109.28	44.81	1.84	1.63	51.77	18.53	0.66	0.79
27	69.71	1	25.38	1	1	0	0	1	0	0	0	1	13.99	13.38	29.34	53.15	39.48	46.66	55.38	44.22	1.26	1.82	47.72	27.27	0.83	0.7
28	76.39	1	25.39	1	0	0	1	1	0	0	0	1	11.88	15.98	25.81	63.11	47.85	46.73	92.2	38.42	0.95	1.72	45.04	13.6	0.68	0.64
29	66.83	1	26.02	0	0	0	1	1	0	0	1	1	11.02	12.98	31.78	50.25	39.72	49.97	81.18	57.32	1.24	1.69	34.11	8.41	0.6	0.86
30	84.41	1	25.75	0	0	1	1	0	0	0	1	1	16.44	7.51	24.91	53.71	46.72	39.5	66.28	63.65	1.74	1.87	52.44	18.7	0.77	0.9
31	81.09	1	25.25	1	1	1	1	0	0	0	0	1	4.95	7.15	25.62	48.94	48.74	66.98	84.7	56.85	1.69	1.72	50.59	17.28	0.52	0.79
32	63.57	1	23.05	0	1	0	1	0	0	0	0	1	5.71	11.24	26.08	44.1	40	36.81	81.91	59.9	1.22	1.84	39.98	15.71	0.7	0.98
33	65.91	1	23.85	0	0	1	1	1	1	1	0	1	8.84	12.63	16.92	63.55	47.42	29.46	77.74	57.92	1.43	1.51	50.78	14.97	0.42	1.02
34	75.85	0	26.48	0	0	0	0	0	0	0	0	1	4.82	12.37	23.97	60.66	48.26	32.07	80.27	64.27	1.24	1.85	35.49	23.23	0.82	0.6
35	79.47	1	26.46	0	0	1	1	0	0	0	0	1	10.48	8.05	23.55	70.3	33.46	39.48	65.04	57.65	0.83	1.68	31	20.58	0.69	0.9
36	70.51	1	25.95	1	0	0	1	1	0	0	1	1	14.63	14.76	18.53	66.3	42.47	53.21	89.42	56.43	0.89	1.66	44.59	13.78	0.73	0.7
37	83.89	1	24.5	1	0	0	0	1	0	0	0	1	9.26	12.68	19.99	49.88	39.76	48.96	75.18	49.36	1.59	2.07	49.12	18.34	0.64	1.06
38	68.61	1	25.36	0	0	0	1	1	0	0	0	1	15.08	11.65	35.04	58.42	32.89	50.08	78.77	61.47	1.91	1.74	22.73	21.09	0.76	0.78
39	57.44	1	25.66	0	0	1	0	1	1	0	1	1	12.96	9.1	26.03	62.8	42.67	49.42	71.28	54.84	1.14	1.83	44.67	23.8	0.72	0.81
40	62.49	0	27.56	1	1	0	1	0	1	0	0	2	7.09	2.95	19.46	30.91	46.03	51.31	60.78	43.83	1.23	1.87	49.64	9.93	0.63	0.84
41	73.11	0	23.28	0	0	1	0	1	0	0	0	2	9.93	6.91	18.7	60.57	40.32	30.45	84.25	66.61	1.87	1.61	47.25	12.88	0.87	0.76
42	85.43	0	27.42	0	0	0	1	0	1	0	0	2	6.98	14.02	20.52	45.99	38.42	33.15	73.11	60.4	1.6	1.69	16.76	19.56	0.76	0.74
43	87.74	1	25.89	0	1	1	1	1	0	0	0	2	11.43	8.89	24.91	63.31	31.28	41.47	67.91	61.74	1.39	2.12	49.04	22.08	0.59	0.69
44	58.08	1	25.09	0	1	0	1	0	0	0	0	2	14.4	9.69	18.72	54.85	44.61	51.27	84.91	37.02	1.16	1.62	45.49	6.15	0.68	0.65
45	54.97	0	25.09	1	0	0	1	1	0	0	0	2	8.8	11.34	26.88	59.14	43.86	62.83	85.84	67.24	1.31	2.01	57.02	14.85	0.61	0.72
46	50.76	0	26.52	0	0	1	1	0	0	0	0	2	13.47	5.71	24.66	48.82	41.62	57.37	79.3	49.75	1.26	1.51	58.72	23.39	0.62	0.83
47	52.69	1	26.47	1	1	1	0	1	0	0	0	2	12.06	14.51	20.57	51.48	45.65	48.15	79.78	50.8	1.23	1.88	46.53	11.68	0.68	0.65
48	83.69	1	26.91	0	1	1	1	0	1	1	0	2	8.14	18.16	37.65	40.93	37.26	63.31	66.12	50.81	1.56	1.82	39	16.26	0.63	0.79
49	74.94	0	25.1	1	1	0	1	1	0	1	1	2	11.31	12.32	16.08	57.77	39.74	38.31	100.8	48.83	1.08	1.76	39.8	26.48	0.66	1.05
50	49.07	1	24.8	0	0	0	1	1	1	1	0	2	11.99	9.59	28.4	62.42	41.32	49.04	69.93	48.3	1.33	1.79	49.72	19.85	0.56	0.6
51	60.45	1	25.23	0	0	1	0	1	1	0	0	2	10.87	8.05	32.56	53.5	41.39	46.03	57.39	43.69	1.71	1.86	18.84	13.57	0.72	0.71
52	53.81	1	25.25	1	0	0	1	0	0	0	0	2	13.09	11.27	22.36	50.87	40.37	56.7	90.77	58.83	1.85	2.02	32.37	14.65	0.76	0.65
53	65.11	1	26.84	0	0	1	1	1	0	0	1	2	4.3	10.26	23.31	64.33	43.47	47.89	55.01	55.84	1.26	2.05	31.74	21.39	0.58	0.84
54	60.67	0	27.11	0	0	0	1	0	0	0	0	2	11.28	7.51	21.7	47.46	42.56	51.47	92.59	58.26	1.27	1.81	39.14	12.71	0.61	1

## Sheet: Deff
	non-MACE group	MACE group	Statistic	P_value	Significance	Data Type	Statistical Method	Mean_A	SD_A	Median_A	Q1_A	Q3_A	Min_A	Max_A	Mean_B	SD_B	Median_B	Q1_B	Q3_B	Min_B	Max_B	KS_test_P_A	SW_test_P_A	KS_test_P_B	SW_test_P_B	Kurtosis_A	Skewness_A	Kurtosis_B	Skewness_B	Variance_test_P	Cohen_d	Hedges_g	Power	type_I_error	type_II_error	Indexes
Age (years)	67.13 ± 10.69	66.39 ± 11.51	0.381	0.704	ns	numerical	Two Sample t-test	67.13	10.69	66.82	60.78	75.43	31.1	91.98	66.39	11.51	67.26	58.01	75.11	46.39	87.74	0.937	0.415	0.948	0.124	0.344	-0.367	-1.037	-0.078	0.539	0.066	0.066	0.066	0.05	0.934	Age (years)
Gender [n (%)](1:M;0:F)	51 (60.71%) / 33 (39.29%)	33 (61.11%) / 21 (38.89%)	0.002	0.963	ns	binary	Pearson's Chi-squared test	0.61	0.49	1	0	1	0	1	0.61	0.49	1	0	1	0	1	NA	NA	NA	NA	NA	NA	NA	NA	NA	NA	NA	NA	0.05	NA	Gender [n (%)](1:M;0:F)
BMI (kg/cm2)	25.45 ± 1.46	25.71 ± 1.23	1.079	0.283	ns	numerical	Two Sample t-test	25.45	1.46	25.36	24.41	26.49	22.42	28.89	25.71	1.23	25.63	24.89	26.53	23.05	28.83	0.554	0.574	0.975	0.965	-0.479	0.149	-0.396	0.114	0.176	-0.188	-0.187	0.188	0.05	0.812	BMI (kg/cm2)
Hypertension(1:Y;0:N)	27 (32.14%) / 57 (67.86%)	19 (35.19%) / 35 (64.81%)	0.137	0.711	ns	binary	Pearson's Chi-squared test	0.32	0.47	0	0	1	0	1	0.35	0.48	0	0	1	0	1	NA	NA	NA	NA	NA	NA	NA	NA	NA	NA	NA	NA	0.05	NA	Hypertension(1:Y;0:N)
Diabetes(1:Y;0:N)	8 (9.52%) / 76 (90.48%)	8 (14.81%) / 46 (85.19%)	0.898	0.343	ns	binary	Pearson's Chi-squared test	0.1	0.3	0	0	0	0	1	0.15	0.36	0	0	0	0	1	NA	NA	NA	NA	NA	NA	NA	NA	NA	NA	NA	NA	0.05	NA	Diabetes(1:Y;0:N)
Hyperlipidemia(1:Y;0:N)	14 (16.67%) / 70 (83.33%)	10 (18.52%) / 44 (81.48%)	0.078	0.779	ns	binary	Pearson's Chi-squared test	0.17	0.37	0	0	0	0	1	0.19	0.39	0	0	0	0	1	NA	NA	NA	NA	NA	NA	NA	NA	NA	NA	NA	NA	0.05	NA	Hyperlipidemia(1:Y;0:N)
Lesion vessel numbers(1:single;2:double;3:three or more)	0 : 26 (30.95%)/1 : 39 (46.43%)/2 : 19 (22.62%)	0 : 17 (31.48%)/1 : 22 (40.74%)/2 : 15 (27.78%)	0.599	0.741	ns	categorical	Pearson's Chi-squared test	0.92	0.73	1	0	1	0	2	0.96	0.78	1	0	2	0	2	NA	NA	NA	NA	NA	NA	NA	NA	NA	NA	NA	NA	0.05	NA	Lesion vessel numbers(1:single;2:double;3:three or more)
LVPWT/mm	10.24 ± 3.83	11.27 ± 3.61	1.575	0.117	ns	numerical	Two Sample t-test	10.24	3.83	9.96	7.85	12.86	2.36	19.43	11.27	3.61	11.48	9.37	13.23	2.98	22.92	0.988	0.754	0.396	0.071	-0.448	0.044	0.821	0.041	0.638	-0.275	-0.273	0.347	0.05	0.653	LVPWT/mm
IVST/mm	10.25 ± 3.36	11.22 ± 3.64	1.613	0.109	ns	numerical	Two Sample t-test	10.25	3.36	10.51	7.99	12.38	0.85	17.23	11.22	3.64	11.3	8.07	13.51	2.95	18.16	0.975	0.644	0.879	0.515	-0.111	-0.119	-0.827	0.034	0.501	-0.281	-0.28	0.359	0.05	0.641	IVST/mm
LVESD/mm	22.53 ± 4.48	23.26 ± 5.33	0.859	0.392	ns	numerical	Two Sample t-test	22.53	4.48	22.59	19.77	26	8.86	31.91	23.26	5.33	23.51	19.49	26.2	12.35	37.65	0.743	0.522	0.983	0.863	0.039	-0.396	-0.081	0.263	0.154	-0.15	-0.149	0.137	0.05	0.863	LVESD/mm
LVEDD/mm	53.68 ± 6.52	56.82 ± 8.39	2.335	0.022	*	numerical	Welch Two Sample t-test	53.68	6.52	53.43	50.25	58	36.8	65.89	56.82	8.39	57.7	51.76	63.13	30.91	70.87	0.936	0.218	0.686	0.072	-0.263	-0.341	0.515	-0.7	0.038	-0.43	-0.428	0.687	0.05	0.313	LVEDD/mm
LAD/mm	40.15 ± 5.31	41.91 ± 5.06	1.931	0.056	ns	numerical	Two Sample t-test	40.15	5.31	40.4	36.9	43.67	28.53	54.35	41.91	5.06	42.02	39.54	45.88	30.69	51.08	0.999	0.845	0.923	0.106	-0.167	-0.031	-0.464	-0.44	0.709	-0.337	-0.335	0.483	0.05	0.517	LAD/mm
LVEF/%	53.24 ± 10.74	48.72 ± 9.41	2.526	0.013	*	numerical	Two Sample t-test	53.24	10.74	53.9	45.78	58.59	29.41	82.3	48.72	9.41	49.23	42.29	54.19	29.46	67.68	0.624	0.378	0.934	0.498	-0.138	0.163	-0.418	-0.013	0.305	0.441	0.438	0.709	0.05	0.291	LVEF/%
E-value /(cm/s)	78.13 ± 10.27	77.65 ± 11.67	0.255	0.799	ns	numerical	Two Sample t-test	78.13	10.27	78	70.65	84.06	53.92	101.59	77.65	11.67	77.49	69.44	84.96	55.01	109.28	0.991	0.852	0.892	0.729	-0.561	0.078	-0.155	0.247	0.292	0.044	0.044	0.057	0.05	0.943	E-value /(cm/s)
A-value /(cm/s)	55.45 ± 8.56	52.26 ± 8.12	2.177	0.031	*	numerical	Two Sample t-test	55.45	8.56	55.08	50.75	60.4	31.56	76.98	52.26	8.12	51.45	44.96	57.85	35.91	67.24	0.898	0.923	0.665	0.187	0.162	0.039	-1.004	0.025	0.685	0.38	0.378	0.581	0.05	0.419	A-value /(cm/s)
E/A	1.28 ± 0.34	1.34 ± 0.29	1.062	0.29	ns	numerical	Two Sample t-test	1.28	0.34	1.27	1.04	1.51	0.19	2.03	1.34	0.29	1.26	1.12	1.55	0.83	1.91	0.997	0.776	0.347	0.105	0.258	-0.192	-0.954	0.299	0.216	-0.185	-0.184	0.184	0.05	0.816	E/A
IMT/mm	1.67 ± 0.21	1.76 ± 0.17	2.693	0.008	**	numerical	Two Sample t-test	1.67	0.21	1.68	1.52	1.81	1.21	2.21	1.76	0.17	1.76	1.65	1.85	1.41	2.12	0.999	0.921	0.895	0.301	-0.443	0.035	-0.317	0.203	0.053	-0.47	-0.467	0.763	0.05	0.237	IMT/mm
Vs/(cm/s)	39.25 ± 7.78	42.34 ± 10.31	1.885	0.063	ns	numerical	Welch Two Sample t-test	39.25	7.78	38.7	34.47	44.84	23.51	55.7	42.34	10.31	44.25	36.7	49.51	16.76	61.43	0.921	0.339	0.783	0.551	-0.659	0.061	-0.276	-0.337	0.021	-0.349	-0.347	0.511	0.05	0.489	Vs/(cm/s)
Vd/(cm/s)	16.29 ± 3.46	17.37 ± 5.47	1.303	0.196	ns	numerical	Welch Two Sample t-test	16.29	3.46	16.09	14.57	18.48	4.37	23.61	17.37	5.47	16.7	12.91	22.66	6.15	27.27	0.657	0.124	0.604	0.146	0.803	-0.542	-1.121	-0.015	< 0.001	-0.25	-0.248	0.296	0.05	0.704	Vd/(cm/s)
RI	0.65 ± 0.11	0.68 ± 0.09	1.588	0.115	ns	numerical	Two Sample t-test	0.65	0.11	0.65	0.57	0.72	0.43	0.94	0.68	0.09	0.68	0.63	0.74	0.42	0.87	0.573	0.376	0.978	0.853	-0.299	0.293	0.142	-0.297	0.052	-0.277	-0.275	0.351	0.05	0.649	RI
Crouse integral	0.75 ± 0.07	0.79 ± 0.11	2.369	0.02	*	numerical	Welch Two Sample t-test	0.75	0.07	0.74	0.7	0.8	0.58	0.9	0.79	0.11	0.78	0.7	0.84	0.59	1.06	0.765	0.468	0.919	0.144	-0.447	-0.215	-0.2	0.466	< 0.001	-0.451	-0.449	0.728	0.05	0.272	Crouse integral

## Sheet: cor
	rho	p.value
LVEDD/mm	0.227	0.007
LVEF/%	-0.215	0.011
A-value /(cm/s)	-0.178	0.037
IMT/mm	0.212	0.012
Crouse integral	0.174	0.041

## Sheet: ROC
	Best_threshold	Sensitivities	Specificities	AUC	Youden_index	F1_score
LVEDD/mm	62.025	0.352	0.917	0.634	0.269	0.475
LVEF/%	51.635	0.685	0.631	0.627	0.316	0.274
A-value /(cm/s)	49.76	0.463	0.786	0.605	0.249	0.389
IMT/mm	1.585	0.907	0.369	0.625	0.276	0.628
Crouse integral	0.825	0.352	0.869	0.603	0.221	0.452

## Sheet: logreg
	Coefficient	Std_Error	Wald	P_Value	OR	CI_Lower	CI_Upper	AIC	BIC	Formula
LVEDD/mm	0.061	0.026	2.378	0.017	1.063	1.012	1.120	182.619	188.474	logit(P) = -3.813 + 0.061 * LVEDD/mm
LVEF/%	-0.044	0.018	2.434	0.015	0.957	0.922	0.990	182.376	188.231	logit(P)=1.799-0.044*LVEF/%
A-value /(cm/s)	-0.046	0.022	2.121	0.034	0.955	0.914	0.996	184.004	189.858	logit(P)=2.032-0.046*A-value/(cm/s)
IMT/mm	2.425	0.941	2.578	0.010	11.307	1.891	77.349	181.556	187.411	logit(P)=-4.609+2.425*IMT/mm
Crouse integral	4.984	2.020	2.467	0.014	146.005	3.151	9231.484	182.171	188.025	logit(P)=-4.254+4.984*Crouseintegral

## Sheet: muti_logreg
	Coefficient	Std_Error	Wald_Stat	P_Value	OR	OR_CI_Lower	OR_CI_Upper
LVEDD/mm	0.066	0.028	2.389	0.017	1.069	1.012	1.129
LVEF/%	-0.037	0.019	-1.977	0.048	0.964	0.929	1.000
A-value /(cm/s)	-0.050	0.023	-2.155	0.031	0.951	0.909	0.995
IMT/mm	2.537	1.049	2.420	0.016	12.643	1.619	98.718
Crouse integral	5.052	2.235	2.261	0.024	156.405	1.958	12490.786
